# Supplementary material for: The effect of polymer additives on the rheological properties of dipeptide hydrogelators
Source: Royal Society of Chemistry journal article supplement (doi:10.1039/c2sm25918d), 2012-01-01
Supplement: c2sm25918d.pdf [file c2sm25918d.pdf]

## **The Effect of Polymer Additives on the Rheological Properties of Dipeptide Hydrogelators**

Guillaume Pont,<sup>a</sup> Lin Chen,<sup>b</sup> David G. Spiller<sup>c</sup> and Dave J. Adams<sup>b,\*</sup>

<sup>a</sup> *Ecole Nationale Supérieure de Clermont Ferrand, Ensemble Scientifique des Cézeaux, 24 Avenue des Landais - BP 10187, 63174 AUBIERE Cedex - FRANCE*

<sup>b</sup> *Department of Chemistry, University of Liverpool, Crown Street, Liverpool, L69 7ZD, U.K.*  
Email: [d.j.adams@liverpool.ac.uk](mailto:d.j.adams@liverpool.ac.uk)

<sup>c</sup> *Systems Microscopy Centre, Faculty of Life Sciences, Michael Smith Building, Oxford Road, Manchester, M13 9PT, U.K.*

### **SUPPORTING INFORMATION**

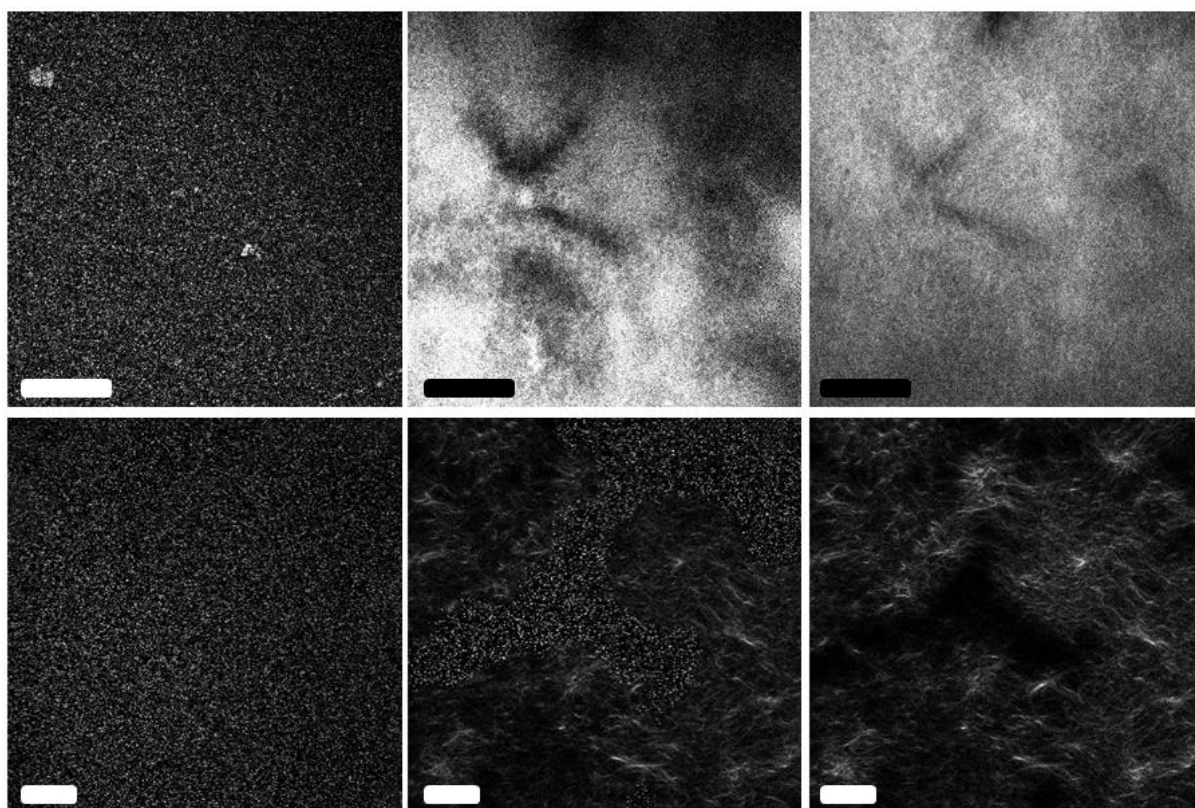

**Figure S1.** Confocal microscope images showing phase separation followed by formation of spherulites for (top) **1** and (bottom) **2** resulting in gels formed at a  $\phi_{\text{DMSO}}$  of 0.05. Left to right shows the initial phase separation to spherical structures, which are then replaced by a fibrous network. In all cases, the scale bar represents 50  $\mu\text{m}$ . The fibrous network from **1** are much finer than for **2** and more difficult to resolve using confocal microscopy.

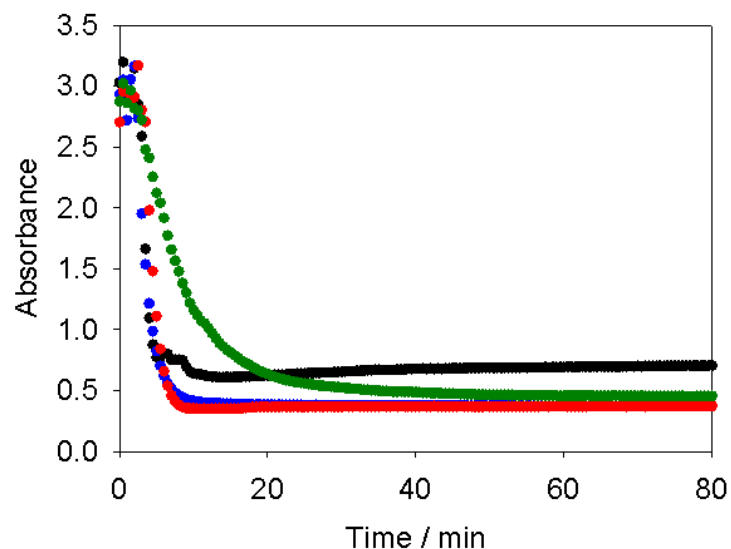

**Figure S2.** Absorbance at 600 nm as a function of time after water or aqueous dextran solutions were added to a solution of **1** in DMSO. The dextran used had a molecular weight of 6000 Da. Solutions had a final concentration of **1** of 0.5 wt% and a  $\phi_{\text{DMSO}}$  of 0.10. Black data is for **1** alone; blue data for 10 wt% dextran; red data for 20 wt% dextran; green data for 30 wt% dextran.

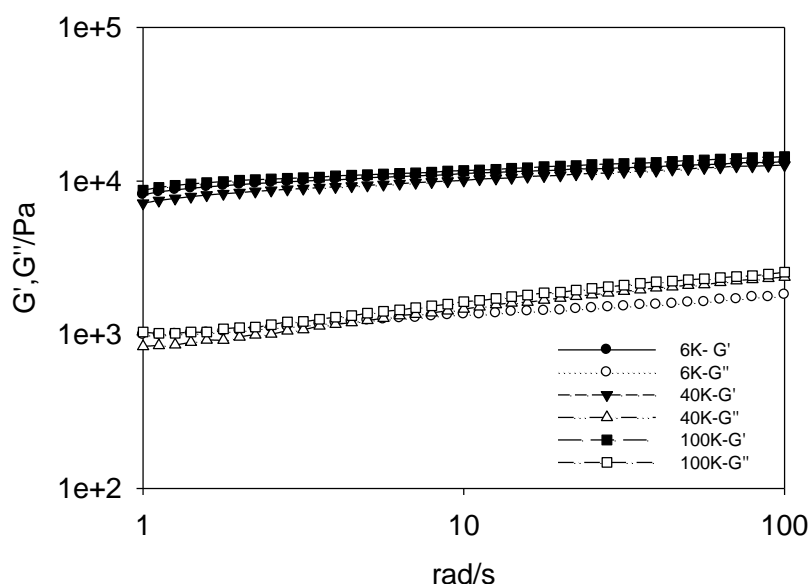

**Figure S3.** Example frequency sweep data for gels formed at a final concentration of **1** of 0.5 wt% and a  $\phi_{\text{DMSO}}$  of 0.10 with addition of dextran to a concentration of 20 wt%.

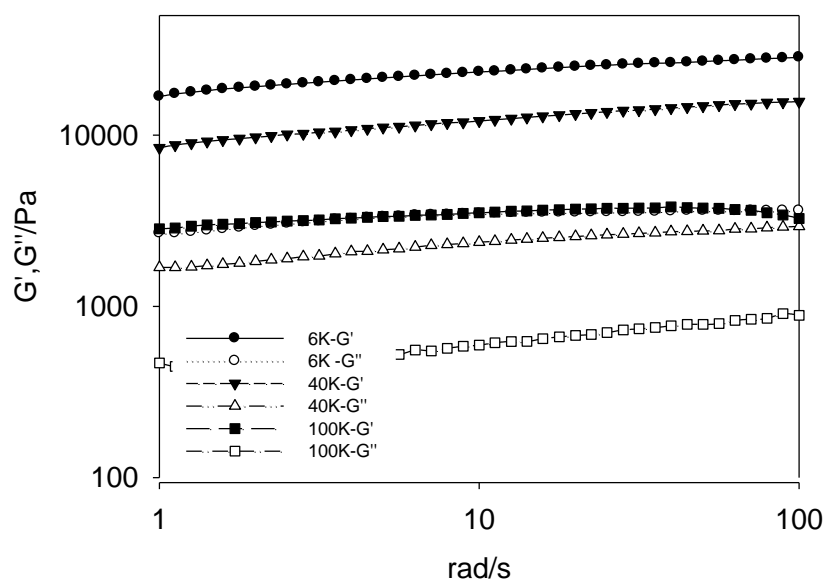

**Figure S4.** Example frequency sweep data for gels formed at a final concentration of **2** of 0.5 wt% and a  $\phi_{\text{DMSO}}$  of 0.10 with addition of dextran to a concentration of 20 wt%.

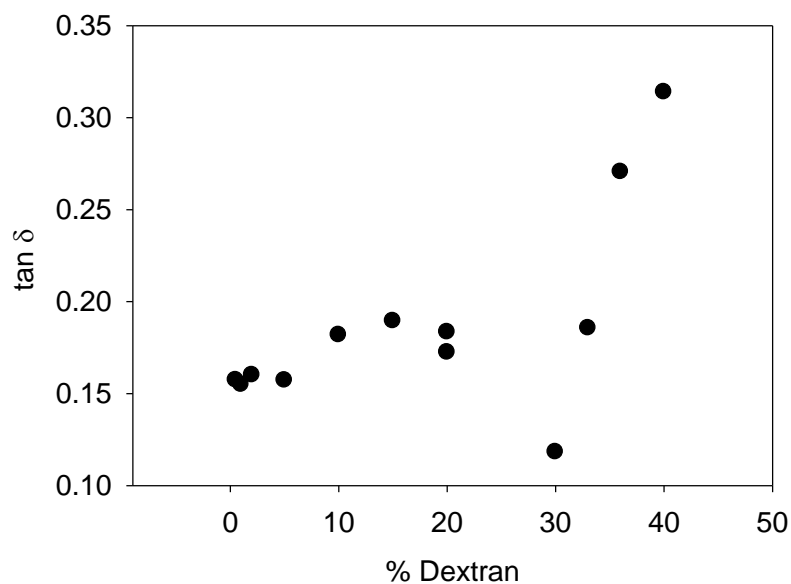

**Figure S5.** Plot of % dextran against  $\tan \delta$  for gels formed at a final concentration of **2** of 0.5 wt% and a  $\phi_{\text{DMSO}}$  of 0.10 with addition of dextran (100 K Da).
